# Supplementary material for: Rapid lipidomics analysis for sepsis-induced liver injury in rats and insights into lipid metabolic pathways using ultra-performance liquid chromatography/mass spectrometry
Source: Royal Society of Chemistry journal article supplement (doi:10.1039/c9ra05836b), 2019-01-01
Supplement: c9ra05836b1.pdf [file c9ra05836b1.pdf]

**Table S1** The serum lipid using the untargeted lipidomics workflow based on ultra-high performance liquid chromatography-mass spectrometry and multivariate analysis

| No. | Rt(min) | Ion form | m/z    | Proposed compound                           | Formula     | Trend in model |
|-----|---------|----------|--------|---------------------------------------------|-------------|----------------|
| 1   | 8.42    | M-H      | 766.54 | PC(20:4(5Z,8Z,11Z,14Z)/15:0)                | C43H78NO8P  | ↑              |
| 2   | 7.27    | M+H      | 808.58 | PC(18:3(6Z,9Z,12Z)/20:2(11Z,14Z))           | C46H82NO8P  | ↑              |
| 3   | 2.59    | M+H      | 806.56 | PC(18:2(9Z,12Z)/20:4(8Z,11Z,14Z,17Z))       | C46H80NO8P  | ↑              |
| 8   | 5.37    | M-H      | 767.49 | PG(18:2(9Z,12Z)/18:3(6Z,9Z,12Z))            | C42H73O10P  | ↓              |
| 4   | 2.05    | M+H      | 819.51 | PG(18:3(6Z,9Z,12Z)/22:5(4Z,7Z,10Z,13Z,16Z)) | C46H75O10P  | ↑              |
| 5   | 7.38    | M+H      | 726.51 | PE(20:4(8Z,11Z,14Z,17Z)/15:0)               | C40H72NO8P  | ↓              |
| 6   | 7.29    | M+H      | 772.58 | PE(14:1(9Z)/24:1(15Z))                      | C43H82NO8P  | ↑              |
| 7   | 1.62    | M+H      | 784.51 | PS(16:1(9Z)/20:3(8Z,11Z,14Z))               | C42H74NO10P | ↓              |
| 9   | 3.89    | M-H      | 564.53 | Cer(d18:0/18:1(9Z))                         | C36H71NO3   | ↓              |
| 10  | 5.10    | M-H      | 566.55 | Cer(d18:0/18:0)                             | C36H73NO3   | ↓              |
| 11  | 2.78    | M-H      | 785.65 | SM(d18:1/22:0)                              | C45H91N2O6P | ↓              |

**Table S2** The metabolic pathway analysis results of lipid profile alterations in sepsis-induced liver injury.

| Name                                                  | Total | Expected | Hits | Raw p     | FDR     | Impact  |
|-------------------------------------------------------|-------|----------|------|-----------|---------|---------|
| Glycerophospholipid metabolism                        | 30    | 0.064194 | 2    | 0.0013111 | 0.1062  | 0.23056 |
| Linoleic acid metabolism                              | 5     | 0.010699 | 1    | 0.010668  | 0.43207 | 0       |
| alpha-Linolenic acid metabolism                       | 9     | 0.019258 | 1    | 0.019148  | 0.51701 | 0       |
| Glycosylphosphatidylinositol(GPI)-anchor biosynthesis | 14    | 0.029957 | 1    | 0.02968   | 0.60102 | 0.0439  |
| Sphingolipid metabolism                               | 21    | 0.044936 | 1    | 0.044297  | 0.71762 | 0       |
| Arachidonic acid metabolism                           | 36    | 0.077033 | 1    | 0.075124  | 1       | 0       |

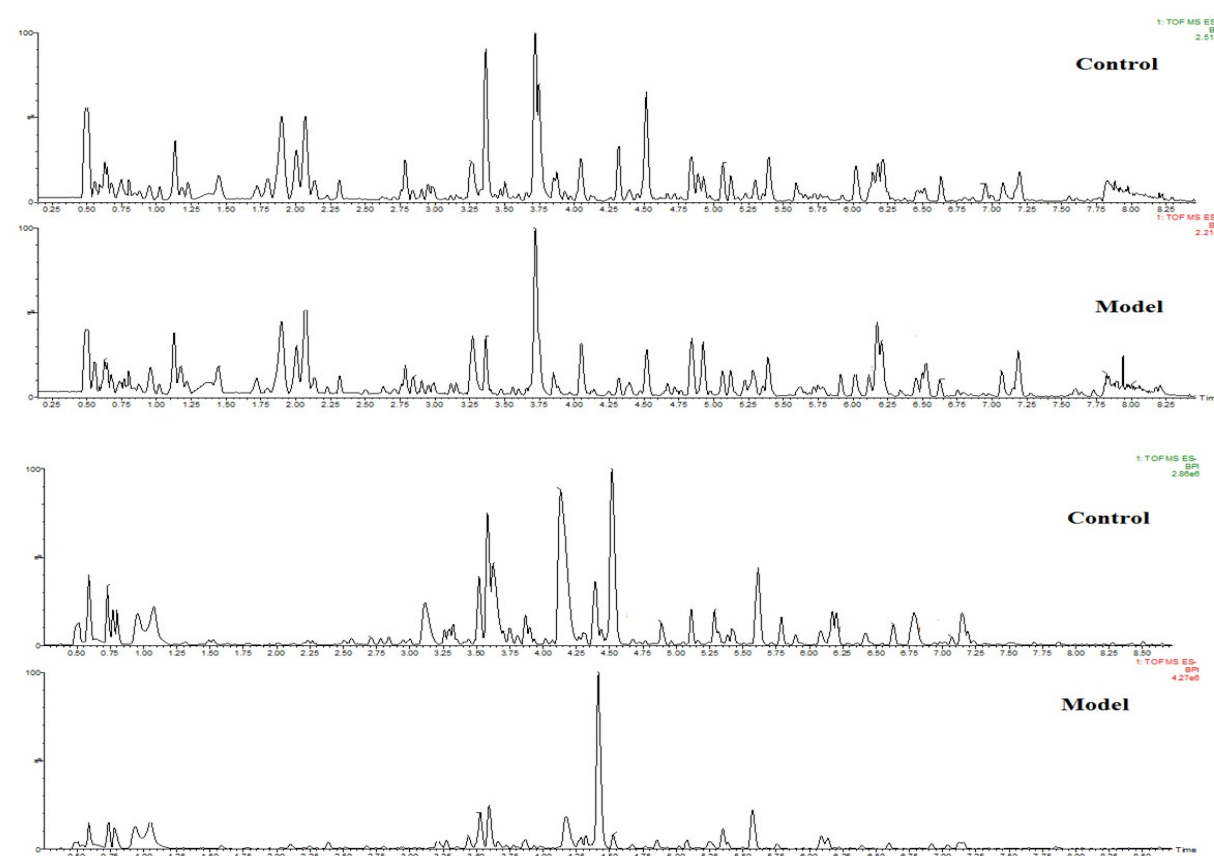

Figure S1. The total ion chromatograms of the control group and the model group in positive and negative ion mode
